# Supplementary material for: Improving the stability of the perovskite solar cells by V2O5modified transport layer film
Source: Royal Society of Chemistry journal article supplement (doi:10.1039/c7ra01303e), 2017-01-01
Supplement: c7ra01303e1.pdf [file c7ra01303e1.pdf]

## Electronic Supplementary Information

### Electronic

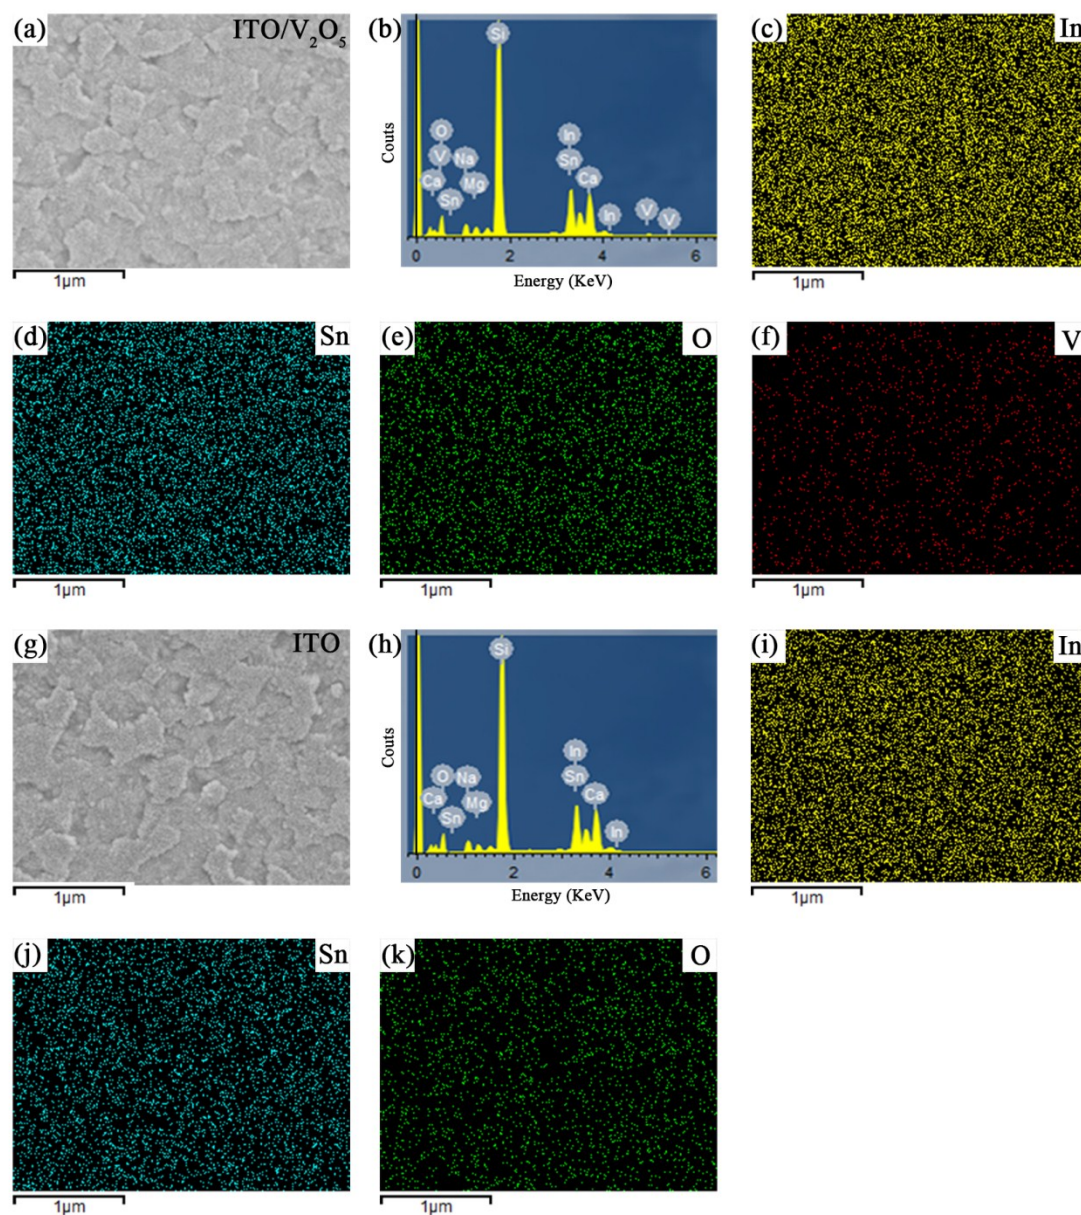

**Fig. S1** The FESEM images (a and g), EDS spectra (b and h) and mapping for In (c and i), Sn (d and j), O (e and k) and V element (f) of the ITO/V<sub>2</sub>O<sub>5</sub> film (a-f) and ITO electrode (g-k).

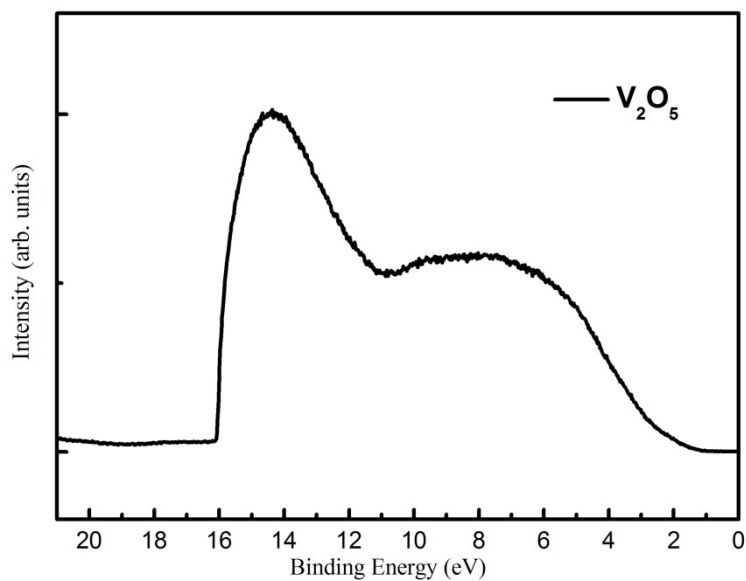

**Fig. S2** The UPS spectra of  $V_2O_5$  film.

**Tab. S1** The change of key performance parameters of PSCs with four different structures after 300 h, including  $V_{OC}$ ,  $J_{SC}$ , FF and PCE.

| Device                  | $V_{OC}$ (V) |      |          | $J_{SC}$ (mA/cm <sup>2</sup> ) |       |         | FF   |      |          | PCE (%) |       |         |
|-------------------------|--------------|------|----------|--------------------------------|-------|---------|------|------|----------|---------|-------|---------|
|                         | 0h           | 300h | rate (%) | 0h                             | 300h  | rate(%) | 0h   | 300h | Rate (%) | 0h      | 300h  | rate(%) |
| with $V_2O_5$ and Bphen | 0.94         | 0.91 | 96.8     | 22.88                          | 17.87 | 78.1    | 0.73 | 0.72 | 98.6     | 15.49   | 11.45 | 73.9    |
| with only $V_2O_5$      | 0.89         | 0.76 | 85.4     | 21.80                          | 16.64 | 76.3    | 0.64 | 0.43 | 67.2     | 12.85   | 5.36  | 41.7    |
| with only Bphen         | 0.92         | 0.89 | 96.7     | 20.49                          | 15.23 | 74.3    | 0.71 | 0.62 | 87.3     | 13.98   | 8.54  | 61.1    |
| none                    | 0.86         | 0.68 | 79.1     | 19.26                          | 9.29  | 48.2    | 0.64 | 0.21 | 32.8     | 11.08   | 1.22  | 11.0    |
